# Supplementary material for: CHANGES IN PAIN AND DISABILITY IN PATIENTS WITH SHOULDER PAIN AFTER THREE MONTHS OF DIGITALLY DELIVERED EXERCISE AND PATIENT EDUCATION
Source: PubMed Central journal article supplement — J Rehabil Med. 2023 Nov 14;55:9415. doi: 10.2340/jrm.v55.9415 (PMC10658804; doi:10.2340/jrm.v55.9415), 2023-11-14
Supplement: JRM-55-9415-s2.pdf [file JRM-55-9415-s2.pdf]

Supplementary material has been published as submitted. It has not been copyedited, typeset or checked for scientific content by Journal of Rehabilitation Medicine

| <b>Table SI. Comparison of demographic and baseline variables between the final sample and dropouts</b> |                         |                      |                 |
|---------------------------------------------------------------------------------------------------------|-------------------------|----------------------|-----------------|
|                                                                                                         | Final sample<br>(n=682) | Dropouts<br>(n=1175) | p-value         |
| Sex [% (n)]                                                                                             |                         |                      | .258            |
| Male                                                                                                    | 31 (209)                | 33 (391)             |                 |
| Female                                                                                                  | 69 (473)                | 67 (784)             |                 |
| Age in years [Mean (SD)]                                                                                | 63.5 (10.3)             | 58.9 (12.7)          | <b>&lt;.001</b> |
| Body mass index (kg/m <sup>2</sup> ) [Mean (SD)]                                                        | 26.0 (4.0)              | 26.4 (4.5)           | <b>.046</b>     |
| Educational level (n=660)                                                                               |                         |                      | .472            |
| At least senior high school [% (n)]                                                                     | 78.5 (518)              | 80.6 (941)           |                 |
| University [% (n)]                                                                                      | 40.8 (269)              | 40.5 (473)           |                 |
| Occupational status [% (n)]                                                                             |                         |                      | <b>&lt;.001</b> |
| Working                                                                                                 | 45.2 (308)              | 54.1 (636)           |                 |
| Retired                                                                                                 | 50.1 (342)              | 36.1 (424)           |                 |
| Sick leave                                                                                              | 2.6 (18)                | 6.0 (71)             |                 |
| Other                                                                                                   | 2.1 (14)                | 3.7 (74)             |                 |
| Self-reported activity level $\geq$ WHO recommendation [% (n)]                                          | 64.5 (440)              | 63.9 (751)           | .802            |
| Duration of shoulder symptoms in months (n=647)                                                         |                         |                      | <b>.033</b>     |
| < 6 months [% (n)]                                                                                      | 26.4 (171)              | 30.5 (329)           |                 |
| 6-12 months [% (n)]                                                                                     | 20.2 (131)              | 22.7 (245)           |                 |
| >12 months [% (n)]                                                                                      | 53.3 (345)              | 46.9 (506)           |                 |
| Pain in other joints [% (n)]                                                                            | 72.3 (493)              | 67.1 (0.19)          | <b>.019</b>     |
| NRS Pain [Mean (SD)]                                                                                    | 5.0 (1.9)               | 5.2 (2.0)            | .087            |
| SPADI Mean (SD)                                                                                         |                         |                      |                 |
| Pain                                                                                                    | 47.4 (17.6)             | 49.0 (19.0)          | .064            |
| Disability                                                                                              | 34.0 (21.1)             | 33.9 (22.4)          | .955            |
| Total index                                                                                             | 40.7 (17.7)             | 41.5 (19.2)          | .376            |
| PASS [% (n)]                                                                                            | 12.2 (83)               | 15.2 (179)           | .067            |
| Medication use <sup>a</sup> [% (n)]                                                                     | 57.7 (381)              | 59.2 (691)           | .550            |

NRS: Numeric rating scale (Range 0-10); SD: Standard deviation; SPADI: Shoulder Pain and Disability Index (0-100); PASS: Patient Acceptable Symptom State.

<sup>a</sup> Medication use: At least occasionally
